# Supplementary material for: Sorption of colored vs. noncolored organic matter by tidal marsh soils
Source: Copernicus journal article supplement (doi:10.5194/bg-21-2599-2024), 2024-05-29
Supplement: Supplementary file 1 [file bg-21-2599-2024-supplement.zip]

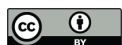

## *Supplement of*

# **Sorption of colored vs. noncolored organic matter by tidal marsh soils**

**Patrick J. Neale et al.**

*Correspondence to:* Patrick J. Neale (nealep@si.edu)

- bg-21-2599-2024-supplement-title-page.pdf
- Post-Incubation
  - PNG files
    - \* Post\_JugBay 00.png
    - \* Post\_JugBay 10.png
    - \* Post\_JugBay 20.png
    - \* Post\_JugBay 35.png
    - \* Post\_KM 00.png
    - \* Post\_KM 10.png
    - \* Post\_KM 20.png
    - \* Post\_KM 35.png
    - \* Post\_Task 00.png
    - \* Post\_Task 10.png
    - \* Post\_Task 20.png
    - \* Post\_Task 35.png
    - \* Post\_Wach 00.png
    - \* Post\_Wach 10.png
    - \* Post\_Wach 20.png
    - \* Post\_Wach 35.png
- Pre-Incubation Standards
  - PNG files
    - \* Pre\_JugBay00.png
    - \* Pre\_JugBay10.png
    - \* Pre\_JugBay20.png
    - \* Pre\_JugBay35.png
    - \* Pre\_KM00.png
    - \* Pre\_KM10.png
    - \* Pre\_KM20.png

- \* Pre\_KM35.png
- \* Pre\_Task00.png
- \* Pre\_Task10.png
- \* Pre\_Task20.png
- \* Pre\_Task35.png
- \* Pre\_Wach00.png
- \* Pre\_Wach10.png
- \* Pre\_Wach20.png
- \* Pre\_Wach35.png

- Readme.rtf

The copyright of individual parts of the supplement might differ from the article licence.
